# Supplementary material
Source: publisher figshare collection journal article supplement (https://acs.figshare.com/ndownloader/files/4686130)
Supplement: Supplementary file 1 [file 4686130]

# Screening the Sequence Selectivity of DNA-Binding Molecules using a Gold Nanoparticle- Based Colorimetric Approach

Sarah J. Hurst,<sup>†</sup> Min Su Han,<sup>†</sup> Abigail K. R. Lytton-Jean, and Chad A. Mirkin\*

## Supporting Information

**Figure S1**

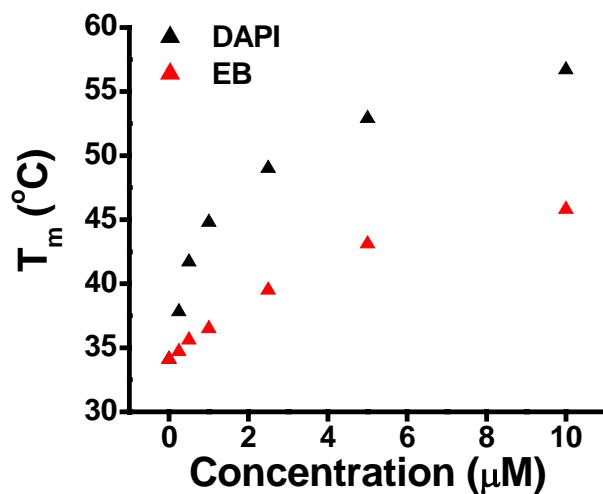

**Figure S1.** Plot of melting temperature ( $T_m$ ) vs. DAPI concentration (black triangles) and EB concentration (red triangles).

Figure S2

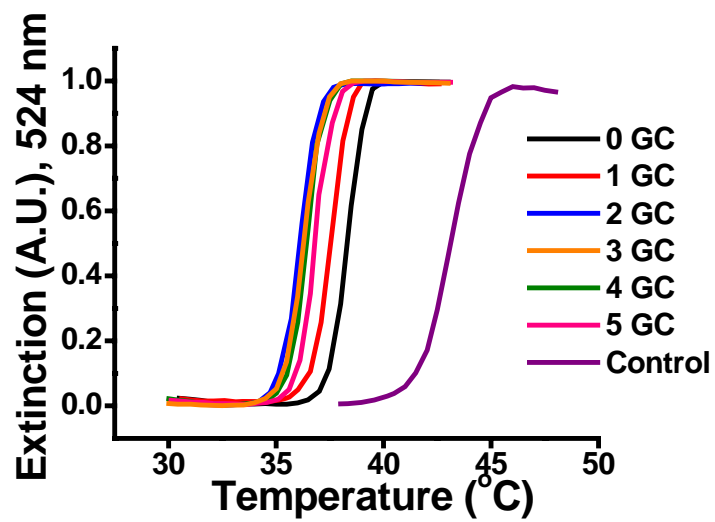

**Figure S2.** Normalized melting curves for aggregates of NP-1 and NP-2 with 5  $\mu$ M EB and 5  $\mu$ M HP DNA (0 GC-5 GC, 1:1 HP:EB). The curve denoted Control contains no HP DNA.

**Figure S3**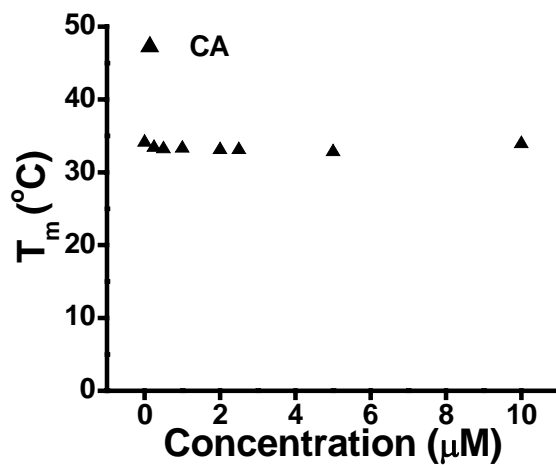

**Figure S3.** Plot of melting temperature ( $T_m$ ) (monitored at  $\lambda = 524$  nm) vs. Chromomycin A concentration (between 0 and 10  $\mu\text{M}$ ) for aggregates of NP-1 and NP-2 (AT-rich).

**Figure S4**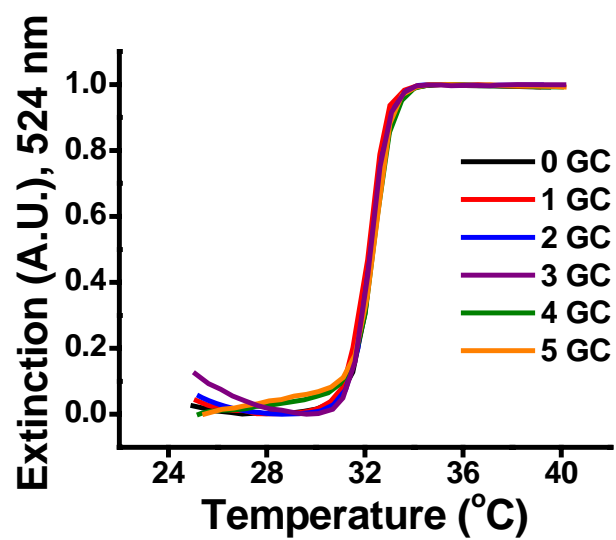

**Figure S4.** Normalized melting curves for aggregates of NP-1 and NP-2 (AT-rich) with 5 μM Chromomycin A and 5 μM HP DNA (0 GC-5 GC, 1:1 HP:Chromomycin A).

**Table S1**

**Table S1.** Melting temperatures ( $T_m$ ) as a function of the HP stem sequence for the Au NP samples in the presence of DAPI. The first stem sequence for each number of GC pairs is the original one presented in the main text of this manuscript (listed for comparison); the second stem sequence shown for each possesses the same number of GC pairs arranged in a different order.

|      | Stem Sequence  | NP $T_m$ (°C) |      | Stem Sequence  | NP $T_m$ (°C) |
|------|----------------|---------------|------|----------------|---------------|
| 0 GC | ATAAT<br>TATTA | 36.1          | 3 GC | ATCCG<br>TAGGC | 48.2          |
|      | AATTA<br>TTAAT | 35.0          |      | AGCTG<br>TCGAC | 51.5          |
| 1 GC | AGATT<br>TCTAA | 40.3          | 4 GC | GCGCT<br>CGCGA | 50.7          |
|      | ATATG<br>TATAC | 39.4          |      | AGCCG<br>TCGGC | 51.3          |
| 2 GC | CATTG<br>GTAAC | 45.8          | 5 GC | CGCGC<br>GCGCG | 51.1          |
|      | ATCTG<br>TAGAC | 42.6          |      | GGCGG<br>CCGCC | 50.9          |

**Table S2**

**Table S2.** Melting temperatures ( $T_m$ ) as a function of the HP stem sequence for the Au NP samples and for a control sample (no NPs) for the EB system. The rightmost column shows the difference between the  $T_m$  of the HP DNA and its  $T_m$  with EB in solution. NA is denoted where the data in that box is not applicable.

|         | Stem Sequence  | NP $T_m$ (°C) | HP $T_m$ (5 $\mu$ M) (°C) | HP $T_m$ (with EB, 1:1) (°C) | $\Delta$ HP $T_m$ (°C) |
|---------|----------------|---------------|---------------------------|------------------------------|------------------------|
| 0 GC    | ATAAT<br>TATTA | 33.6          | 51.0                      | 62.0                         | 11.0                   |
| 1 GC    | ATATG<br>TATAC | 38.3          | 55.5                      | 66.6                         | 11.1                   |
| 2 GC    | CATTG<br>GTAAC | 37.6          | 64.8                      | 74.5                         | 9.7                    |
| 3 GC    | ATCCG<br>TAGGC | 36.1          | 70.7                      | 80.7                         | 10.0                   |
| 4 GC    | GCGCT<br>CGCGA | 36.3          | 78.4                      | 87.3                         | 8.9                    |
| 5 GC    | CGCGC<br>GCGCG | 36.4          | 85.8                      | 89.7                         | 3.9                    |
| Control | NA             | 43.1          | NA                        | NA                           | NA                     |
